# Supplementary material
Source: Frontiers journal article supplement (https://www.frontiersin.org/articles/514841)
Supplement: Data_Sheet_1.pdf [file Data_Sheet_1.pdf]

*Supplementary Material***1** Supplementary Figures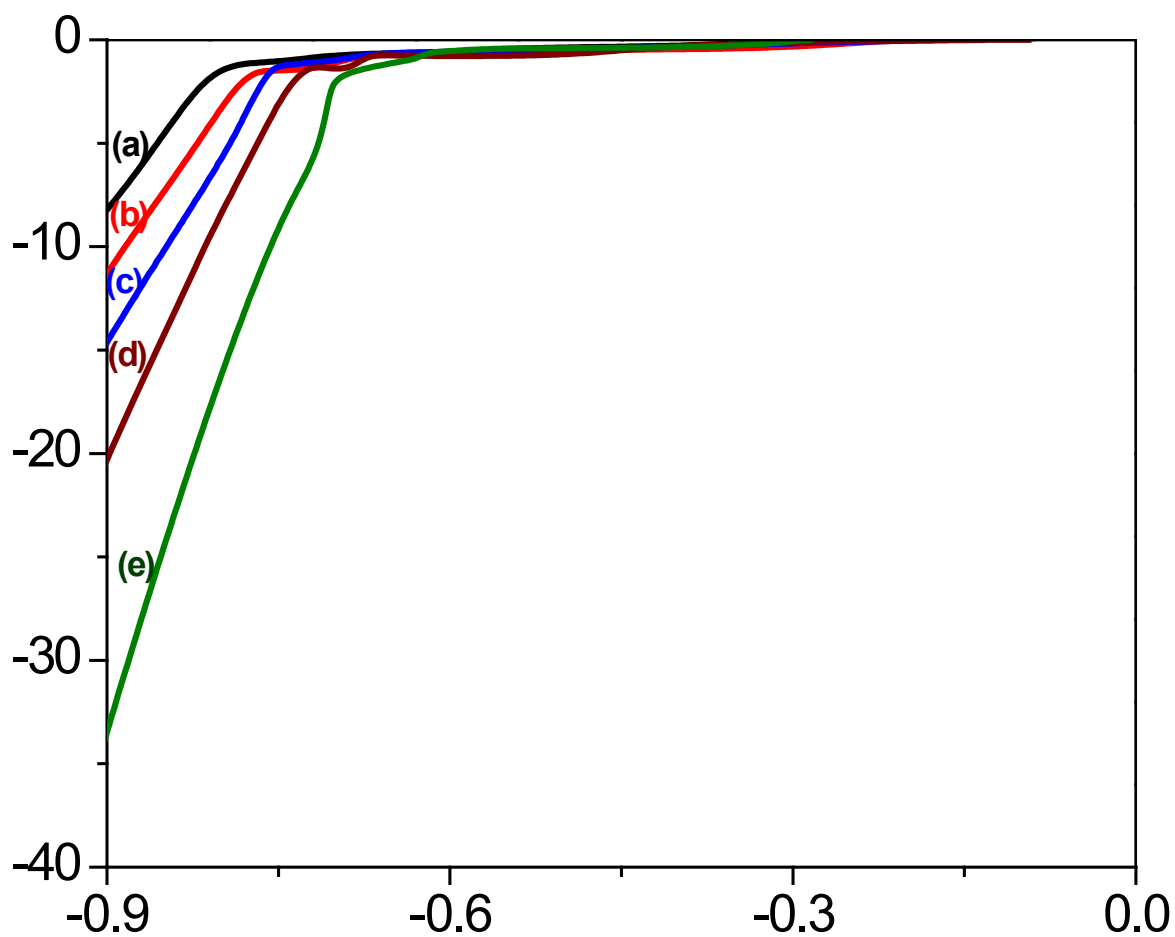

**Figure S1.** LSV curve of  $\text{TeO}_3^{2-}$  in alkaline solutions with different  $\text{TeO}_3^{2-}$  concentration: (a) 25, (b) 50, (c) 100, (d) 300 and (e) 550 mM at pH of 12.0 and temperature of 23 °C. Thick Te films were used as substrate.

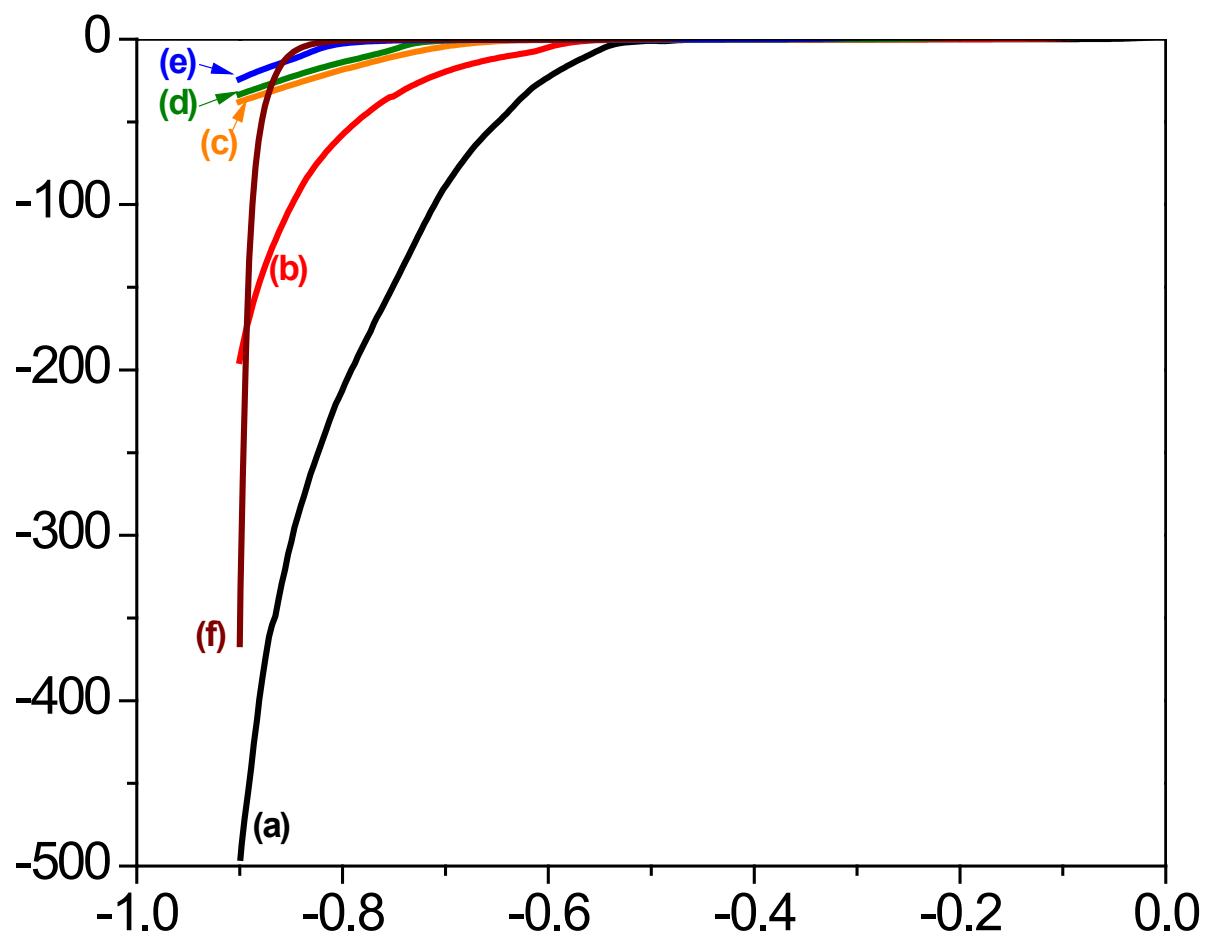

**Figure S2.** LSV curve of  $\text{TeO}_3^{2-}$  in alkaline solutions at different pH: (a) 10.2, (b) 11.0, (c) 12.2, (d) 12.5, (e) 13.1 and (f) 14.7.  $\text{TeO}_3^{2-}$  concentration was fixed at 550 mM and temperature was fixed at 23 °C. Thick Te films were used as substrate.

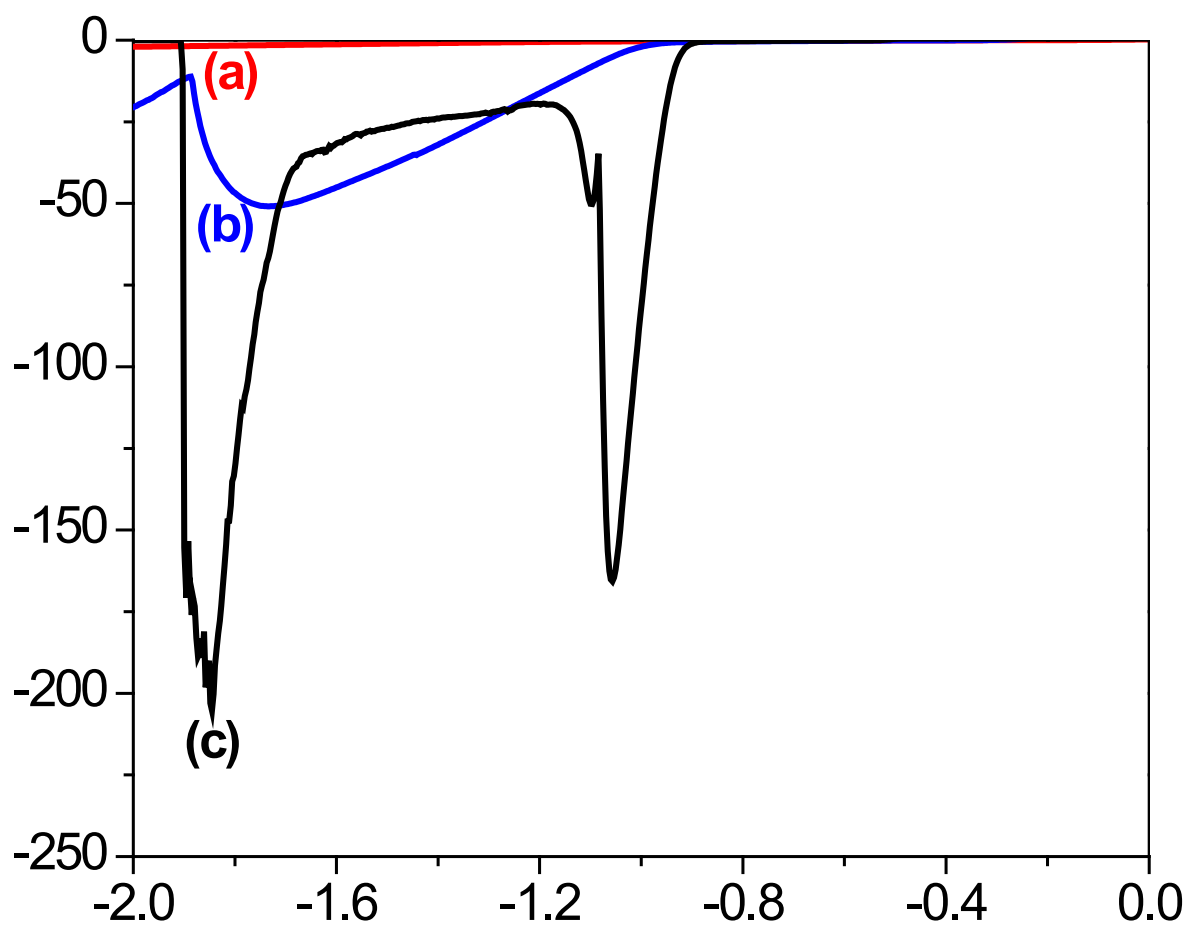

**Figure S3.** LSV curve of Te in alkaline solutions at different pH: (a) 10.2, (b) 12.5 and (c) 14.7.  $\text{TeO}_3^{2-}$  concentration and temperature were fixed at 0 mM and 23 °C, respectively. Thick Te films were used as substrate.

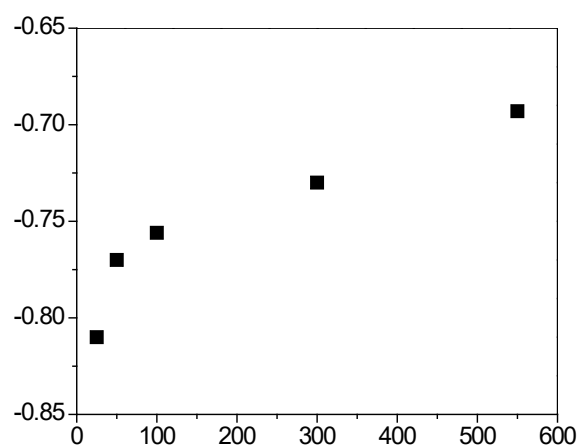

**Figure S4.** Onset potential of  $\text{TeO}_3^{2-}$  reduction reaction in alkaline solutions with different  $\text{TeO}_3^{2-}$  concentration (25, 50, 100, 300 and 550 mM) at pH of 12.0 and temperature of 23 °C. Thick Te films were used as substrate.

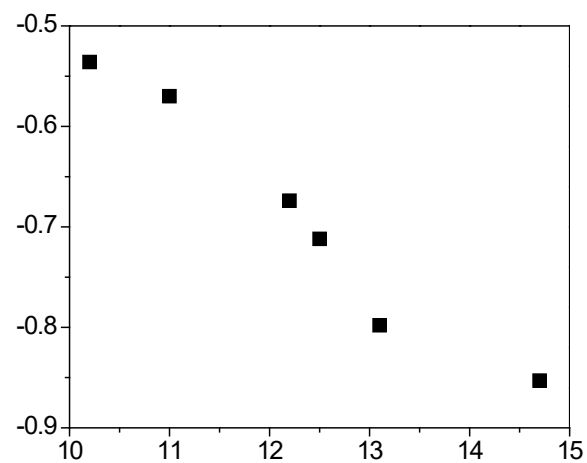

**Figure S5.** Onset potential of  $\text{TeO}_3^{2-}$  reduction reaction in alkaline solutions at different pH (10.2, 11.0, 12.2, 12.5, 13.1 and 14.7).  $\text{TeO}_3^{2-}$  concentration was fixed at 550 mM and temperature was fixed at 23 °C. Thick Te films were used as substrate.

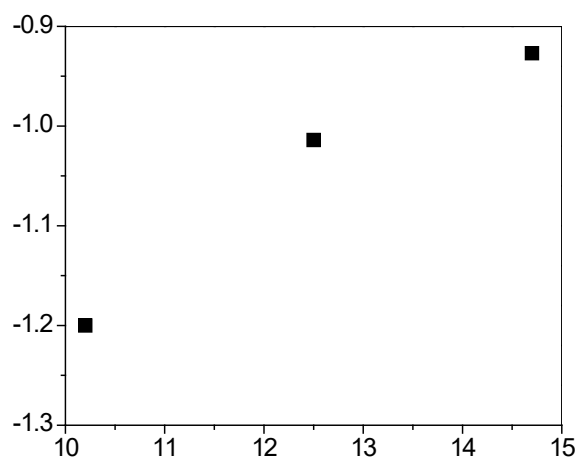

**Figure S6.** Onset potential of Te reduction reaction in alkaline solutions at different pH (10.2, 12.5 and 14.7).  $\text{TeO}_3^{2-}$  concentration was 0 mM and temperature was fixed at 23 °C. Thick Te films were used as substrate.

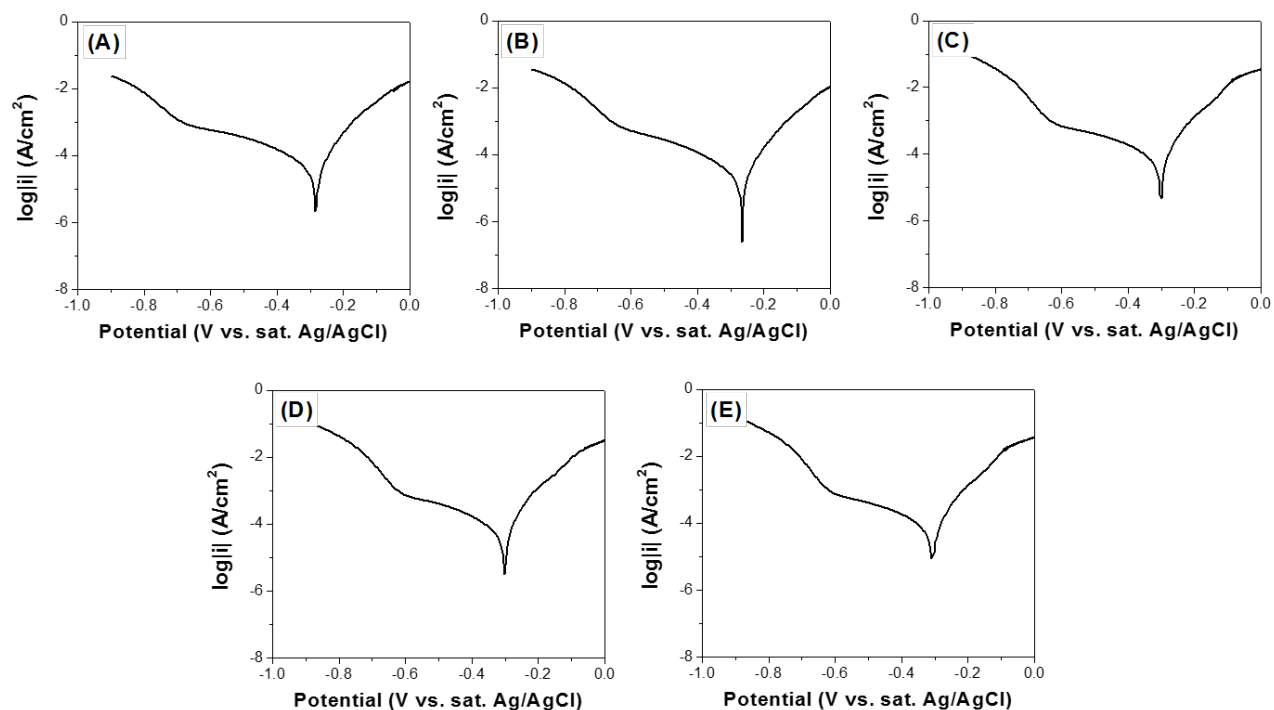

**Figure S7.** Tafel plot of  $\text{TeO}_3^{2-}$  reduction in alkaline solutions with different  $[\text{TeO}_3^{2-}]$ . (A) 50, (B) 100, (C) 300, (D) 400, (E) 550 mM. The experiments were conducted using Te as a substrate at pH of 12.0 and temperature of 23 °C.

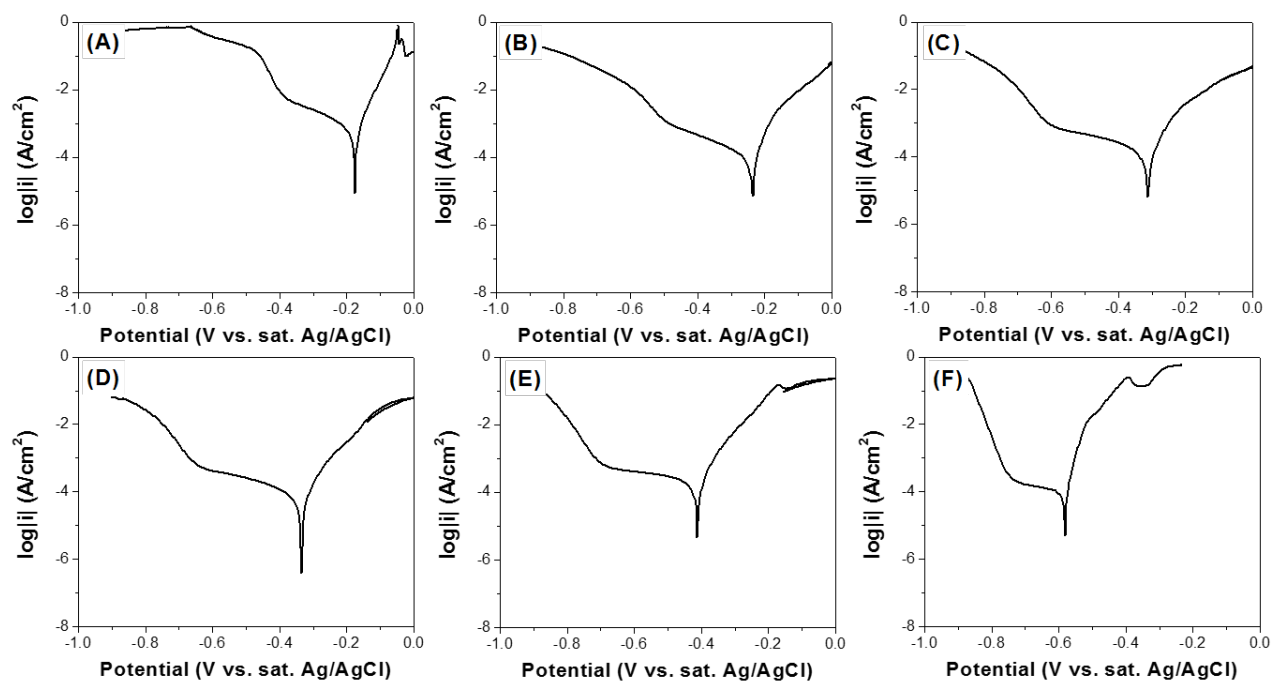

**Figure S8.** Tafel plot of  $\text{TeO}_3^{2-}$  reduction in alkaline solutions with different pH: (A) 10.2, (B) 11.0, (C) 12.2, (D) 12.5, (E) 13.1, (F) 14.7 (calculated value). The experiments were conducted using Te as a substrate at  $[\text{TeO}_3^{2-}]$  of 550 mM and temperature of 23 °C.



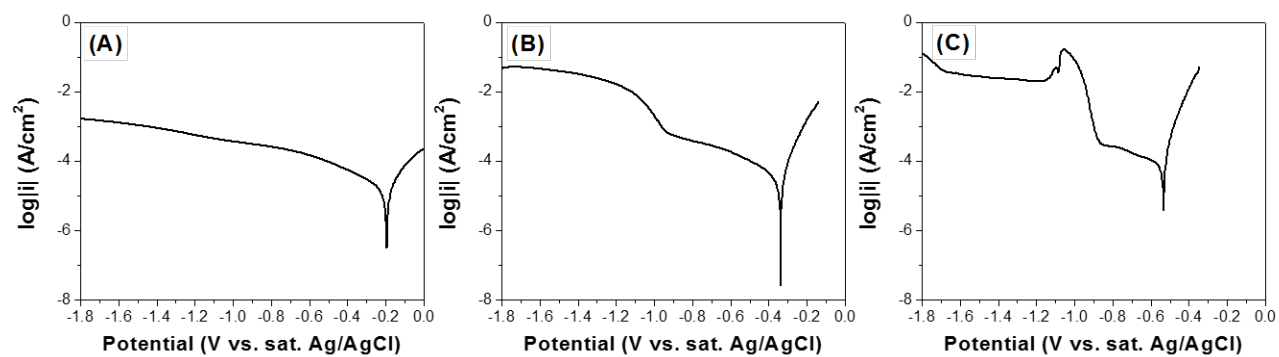

**Figure S9.** Tafel plot of Te dissolution in alkaline solutions with different pH: (A) 10.2, (B) 12.5 and (C) 14.7(calculated value). The experiments were conducted using Te as a substrate at  $[\text{TeO}_3^{2-}]$  of 0 mM and temperature of 23 °C.
